# Supplementary material for: Serological evidence for transmission of multiple dengue virus serotypes in Papua New Guinea and West Papua prior to 1963
Source: PubMed Central journal article supplement (PMC5426789; doi:10.1371/journal.pntd.0005488), 2017-04-24
Supplement: pntd.0005488.s001.pdf [file pntd.0005488.s001.pdf]

|   | Group                            | n  | DENV-1 | DENV-2 | DENV-3 | DENV-4 |
|---|----------------------------------|----|--------|--------|--------|--------|
| 1 | Anti-DENV seronegative*          | 20 | <10    | <10    | <10    | <10    |
| 2 | Standard antisera <sup>^</sup> : |    |        |        |        |        |
|   | Anti-DENV-1                      | 1  | 10     | <10    | <10    | <10    |
|   | Anti-DENV-2                      | 1  | <10    | 20     | <10    | <10    |
|   | Anti-DENV-3                      | 1  | <10    | <10    | 10     | <10    |
|   | Anti-DENV-4                      | 1  | <10    | <10    | <10    | 10     |
| 3 | Anti-JEV                         | 2  | <10    | <10    | <10    | <10    |
| 4 | Anti-MVEV                        | 2  | <10    | <10    | <10    | <10    |
| 5 | Anti-KUNV                        | 1  | <10    | <10    | <10    | <10    |
| 6 | Multitypic infection#:           |    |        |        |        |        |
|   | DENV-2; DENV-1                   | 1  | 10     | 80     | 10     | <10    |
|   | DENV-1;DENV-3;DENV-2             | 1  | 160    | 80     | 80     | 20     |
|   | DENV-2;DENV-1;DENV-4             | 1  | 80     | 320    | 40     | 20     |

\* Individuals confirmed seronegative for anti-DENV by microneutralization and hemagglutination inhibition assay, with negative NS1 ELISA test. <sup>^</sup>Standard DENV-1-4 antisera NIBSC 05/248 (National Institute for Biological Standards and Control [NIBSC], Potter's Bar, Hertfordshire, United Kingdom).# Individuals with well-defined (IgM/PCR positive) sequential DENV infection
